# Supplementary material for: Vegetative cell wall protein OsGP1 regulates cell wall mediated soda saline-alkali stress in rice
Source: PeerJ. 2024 Feb 28;12:e16790. doi: 10.7717/peerj.16790 (PMC10908258; doi:10.7717/peerj.16790)
Supplement: Supplemental Information 3 [file peerj-12-16790-s003.xlsx]

## Sheet: SAE
Configuration and characteristics of different ratios of soda saline-alkali soil eluent (SAE)
EC	SAE	10330	10280	10260			10290	36.0555	10290±36
	2:1	3860	3920	3930			3903.33	37.8594	3903±38
	3:1	2890	2930	2960			2926.67	35.1188	2927±35
	4:1	2520	2510	2560			2530	26.4575	2530±26
	Water	82.7	82.5	82.6			82.6	0.1	82.6±0.1
pH	SAE	9.59	9.63	9.74			9.65333	0.0776745	9.65±0.08
	2:1	9.27	9.16	9.21			9.21333	0.0550757	9.21±0.06
	3:1	9.08	9.03	9.12			9.07667	0.0450925	9.08±0.05
	4:1	8.89	8.94	9.01			8.94667	0.0602771	8.95±0.06
	Water	7.02	6.94	6.99			6.98333	0.0404145	6.98±0.04

## Sheet: qPCR
Relative Quantity Chart
W4	Replicate/Well ID	Relative Quantity (dR)	Upper Error Bars	Lower Error Bars
	WT	1	0.79585	0.44316
	#1	7.06131	0.99805	0.61471
	#2	11.0295	0.47371	0.49589
	#3	8.51244	0.57391	0.50368
	#4	10.3133	0.50828	0.40913
	#5	9.05772	0.45957	0.38753
	#6	7.01503	0.35883	0.33609
qRT-PCR was performed on an Agilent Stratagene MxPro-Mx3000p. Relative transcript abundance was calculated according to the manufacturer's instructions. Data are the mean and upper and lower errors of three biological replicates generated by automatic analysis of the instrument.

## Sheet: FW
Fresh weight of 5 seedlings (g)
treatment	control	4:1	3:1	2:1
WT	0.4099	0.2979	0.2766	0.2531
WT	0.3707	0.3071	0.2957	0.2643
WT	0.3837	0.2496	0.2794	0.2543
T3-#2	0.3925	0.3557	0.3087	0.3169
T3-#2	0.4201	0.2988	0.3198	0.2916
T3-#2	0.3615	0.3523	0.341	0.3164
T3-#4	0.3848	0.3364	0.3314	0.2475
T3-#4	0.3511	0.3495	0.3526	0.2761
T3-#4	0.3792	0.3251	0.3138	0.2966
T3-#5	0.3828	0.3083	0.3231	0.3041
T3-#5	0.3693	0.3581	0.3117	0.2594
T3-#5	0.3864	0.3505	0.3344	0.2789

## Sheet: PH
plant height (cm)
treatment	control	4:1	3:1	2:1
WT	12.1	9.2	7.3	5.7
WT	13.3	8.8	6.9	7.4
WT	13.6	8.3	7.7	7.3
WT	14.9	8.7	7.1	6.1
WT	13.1	8.4	6.9	6.8
T3-#2	14.5	12.1	10.5	8.8
T3-#2	14.4	12.3	10.4	9.2
T3-#2	14.2	11.4	11.1	9.1
T3-#2	14.3	11.1	9.6	8.7
T3-#2	12.8	11.8	10.6	8.3
T3-#4	13.7	14.1	9.9	7.9
T3-#4	12.6	12.6	10.4	8.2
T3-#4	12.8	10.9	11.4	9.1
T3-#4	12.9	13.2	10.9	9.4
T3-#4	14.5	10.8	11.1	8.2
T3-#5	12.1	12.3	10.8	9.8
T3-#5	11.5	12.4	8.9	11.2
T3-#5	13.2	11.6	10.7	9.9
T3-#5	11.8	9.6	9.4	9.5
T3-#5	13.3	11.3	9.5	9.3

## Sheet: MDA
MDA contents
treatment	control	4:1	3:1	2:1
WT	8.11799	9.93779	11.7807	13.0817
WT	8.64027	9.18874	12.2604	13.5018
WT	8.73557	9.83098	11.5345	13.314
T3-#2	8.16653	8.27404	9.09269	10.4981
T3-#2	7.96567	8.94889	9.67728	10.2914
T3-#2	7.41503	8.13413	9.80369	10.7136
T3-#4	8.01231	8.31231	9.13269	10.3281
T3-#4	7.71567	8.81231	9.54728	10.1214
T3-#4	7.28285	8.3154	9.67869	10.6536
T3-#5	8.09165	8.22404	9.23169	10.5181
T3-#5	7.76123	8.17689	9.43728	10.8734
T3-#5	7.49501	8.9954	9.87369	10.1232

## Sheet: SOD
SOD activity
treatment	control	4:1	3:1	2:1
WT	683.247	776.444	700.153	728.148
WT	658.043	824.367	699.37	786.982
WT	697.722	841.54	729.722	831.311
T3-#2	652.972	828.442	886.166	980.318
T3-#2	677.072	848.802	906.715	915.825
T3-#2	676.234	865.589	901.521	961.137
T3-#4	676.897	842.713	889.512	962.987
T3-#4	642.242	815.113	932.452	982.876
T3-#4	623.874	888.123	878.423	916.764
T3-#5	697.762	839.214	841.412	939.342
T3-#5	656.132	827.214	933.332	951.123
T3-#5	634.344	871.354	915.323	984.213

## Sheet: POD
POD activity
treatment	control	4:1	3:1	2:1
WT	226.312	222.581	221.811	243.663
WT	215.123	241.935	221.811	271.663
WT	236.337	222.581	247.874	253.663
T3-#2	209.15	392.707	341.614	350.641
T3-#2	261.438	392.707	335.671	400.747
T3-#2	261.444	448.808	321.133	400.802
T3-#4	208.875	392.712	328.124	357.123
T3-#4	254.234	395.714	341.341	401.651
T3-#4	252.423	423.135	362.123	402.412
T3-#5	212.563	394.139	315.612	351.132
T3-#5	245.239	397.732	339.541	405.124
T3-#5	243.124	441.214	354.123	412.548
